# Supplementary material for: Improved coulombic efficiency of single-flow, multiphase flow batteries via the use of strong-binding complexing agents
Source: Royal Society of Chemistry journal article supplement (doi:10.1039/d3ya00293d), 2024-01-01
Supplement: d3ya00293d1.pdf [file d3ya00293d1.pdf]

# Improved Coulombic efficiency of single-flow, multiphase flow batteries via use of strong-binding complexing agents

Prakash Rewatkar<sup>a,d#</sup>, Mohamed Asarthen<sup>b#</sup>, Robert Glouckhovski<sup>a</sup>, Ran Elazari<sup>c</sup> and

Matthew E. Suss<sup>[a,b,d]</sup>

<sup>a</sup>Faculty of Mechanical Engineering, Technion-Israel Institute of Technology, Haifa, 3200003, Israel

<sup>b</sup>The Wolfson Department of Chemical Engineering, Technion-Israel Institute of Technology, Haifa, 3200003, Israel

<sup>c</sup>Israel Chemicals Limited (ICL), Israel

<sup>d</sup>The Nancy & Stephen Grand Technion Energy Program, Technion-Israel Institute of Technology, Haifa, 320003, Israel

#These authors contributed equally to this work

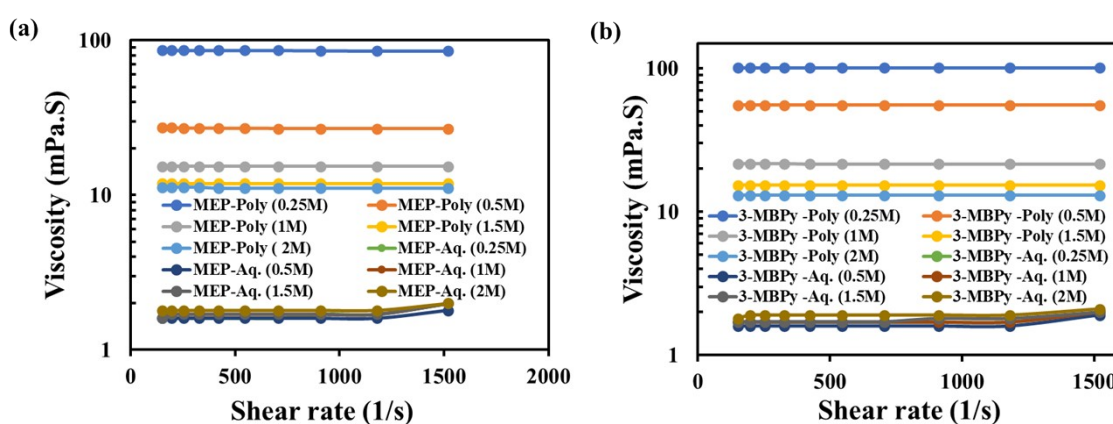

Fig. S1 Measured aqueous and polybromide phases viscosities with shear rate with change in bromine concentration between 0.25 M to 2 M with 2 M ZnBr<sub>2</sub> and 0.5M MEP (Fig (a)) and 3-MBPY (Fig (b)) at 25° C.

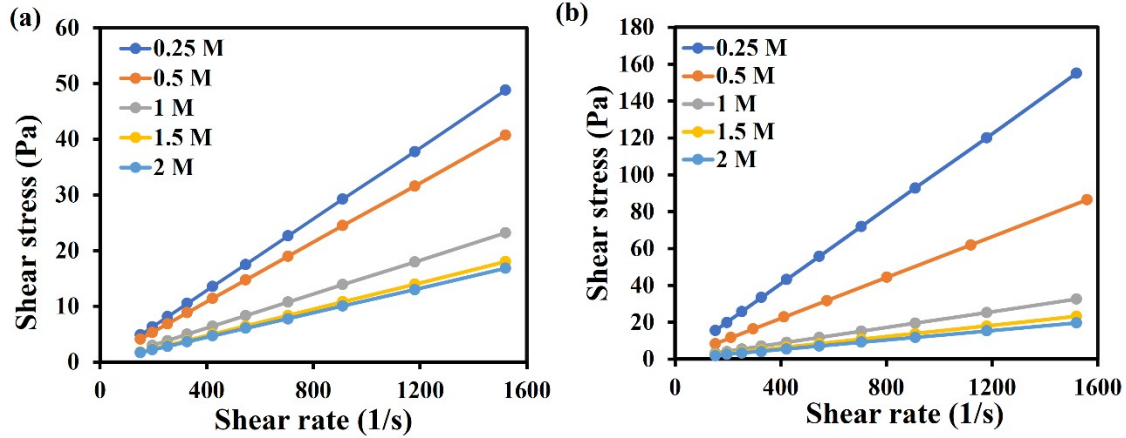

Fig. S2 Newtonian behaviour of polybromide phase with different initial bromine concentration between 0.25 M to 2 M with 2 M ZnBr<sub>2</sub> and 0.5M MEP (Fig (a)) and 3-MBPY (Fig (b)) at 25° C.

Table I The benchmark for selecting appropriate BCAs and their optimal performance

| Battery configuration | Electrode material                       | Electrolyte and BCA                                         |                    | Coulombic efficiency (CE) | Ref.         |
|-----------------------|------------------------------------------|-------------------------------------------------------------|--------------------|---------------------------|--------------|
| Membrane              | Anode→<br>Graphite<br>Cathode→<br>carbon | 2.5 M of zinc bromide, zinc chloride and potassium chloride | 1M[C2MPyrr]Br      | 91.1%                     | 1            |
|                       |                                          |                                                             | 1M [C2MPip]Br      | 80.3%                     |              |
|                       |                                          |                                                             | 1M [C2Py]Br        | 91.1%                     |              |
|                       |                                          |                                                             | 1M [C2OHPy]Br      | 83.4%                     |              |
|                       |                                          |                                                             | 1M [C2MIm]Br       | 90.6%                     |              |
|                       |                                          |                                                             | 1M[C2OHMIm]Br      | 71.4%                     |              |
| Membrane              | Carbon felt                              | 2 M ZnBr <sub>2</sub> ,                                     | 0.6 M MEP·Br       | 95.39%                    | 2            |
| Porous separator      | Graphite felt                            | 3M ZnBr <sub>2</sub><br>2M HClO <sub>4</sub>                | 1M MEM &<br>1M MEP | ≈80%                      | 3            |
| Membraneless          | Graphite                                 | 2 M ZnBr <sub>2</sub> ,<br>0.5 M Br <sub>2</sub>            | 1 M MEP            | 73%                       | 4            |
| Membraneless          | Graphite                                 | 2 M ZnBr <sub>2</sub> ,<br>0.5 M Br <sub>2</sub>            | 0.5 M MEP          | 47%                       | Present work |
|                       |                                          |                                                             | 0.5 M 3-MBPY       | 69%                       |              |

1. Schneider, Martin, et al. "The influence of novel bromine sequestration agents on zinc/bromine flow battery performance." *Rsc Advances* 6.112 (2016): 110548-110556.
2. Kim, Miae, Deokhee Yun, and Joonhyeon Jeon. "Effect of a bromine complex agent on electrochemical performances of zinc electrodeposition and electrodisolution in Zinc–Bromide flow battery." *Journal of Power Sources* 438 (2019): 227020.
3. Adith, Ramakrishnan Velmurugan, et al. "An optimistic approach on flow rate and supporting electrolyte for enhancing the performance characteristics of Zn-Br<sub>2</sub> redox flow battery." *Electrochimica Acta* 388 (2021): 138451.
4. Amit, Lihi, et al. "A Single-Flow Battery with Multiphase Flow." *ChemSusChem* 14.4 (2021): 1068-1073.
